# Supplementary material
Source: MDPI journal article supplement (https://www.mdpi.com/2073-4441/13/14/1959)
Supplement: s1 [file s1]

# Estimating the Reducing Power of Carbon Nanotubes and Granular Activated Carbon Using Various Compounds

Heesoo Woo <sup>1</sup>, Ilho Kim <sup>2</sup> and Saerom Park <sup>2,\*</sup>

**Section 1.** The methods for measuring the concentration of Fe(II) and Cr(VI) were modified from Tamura et al. (1974) [34] and Clesceri et al. (1998) [35], respectively. More details are as follows.

Fe(II) measurement by modified 1,10-phenanthroline method:

1. Preparation of 1,10-phenanthroline solution by mixing (1) ammonium acetate 25 g + deionized water (DW) 15 mL + acetic acid 70 mL, (2) sodium acetate 2.5 g + DW 10 mL, (3) 1,10-phenanthroline 0.2 g + DW 200 mL, and (4) hydrochloric acid 10 mL
2. Take 1 mL of sample and put it in a vial
3. Add 1 mL of DW and 2 mL of the 1,10-phenanthroline solution prepared to the vial
4. Shaking the vial vigorously for 1 min by hand and allow the sample solution to sit at room temperature for a minimum of 15 min.
5. Measure the absorbance of each sample solution at 510 nm using a UV-vis spectrophotometer.

Cr(VI) measurement by modified 1,5-diphenylcarbazide method:

1. Preparation of the coloring reagent for Cr(VI) measurement by mixing 0.25 g of 1,5-diphenylcarbazide and 50 mL of acetone
2. Take 0.5 mL of sample and put it in a vial
3. Add 0.1 mL of the coloring reagent, 0.2 mL of 10% sulfuric acid, and 2.2 mL of DW to the vial
4. Shaking the vial vigorously for 1 min by hand and allow the sample solution to sit at room temperature for a minimum of 15 min.
5. Measure the absorbance of each sample solution at 540 nm using a UV-vis spectrophotometer.

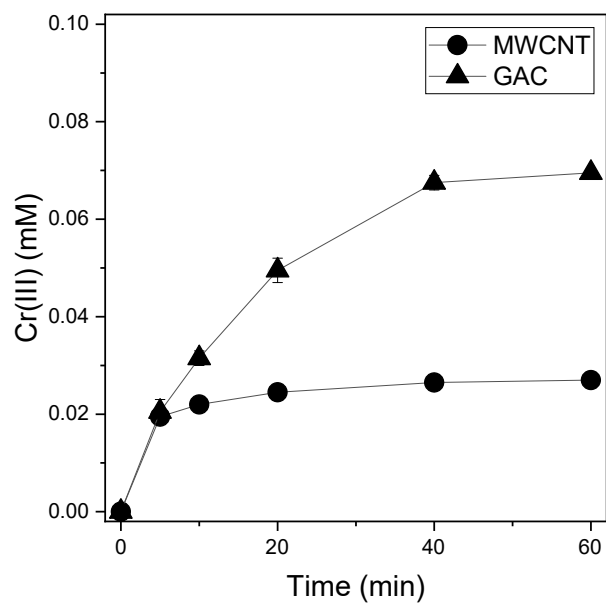

**Figure S1.** Reduction of Cr(VI) to Cr(III) by MWCNT and GAC at acidic pH condition ( $[\text{Cr(VI)}]_0 = 0.1 \text{ mM}$ ,  $[\text{MWCNT-Comocat}]_0 = [\text{GAC}]_0 = 2.0 \text{ g/L}$ ,  $\text{pH}_0 = 2.5$ , anaerobic condition, [reaction time = 60 min]). .

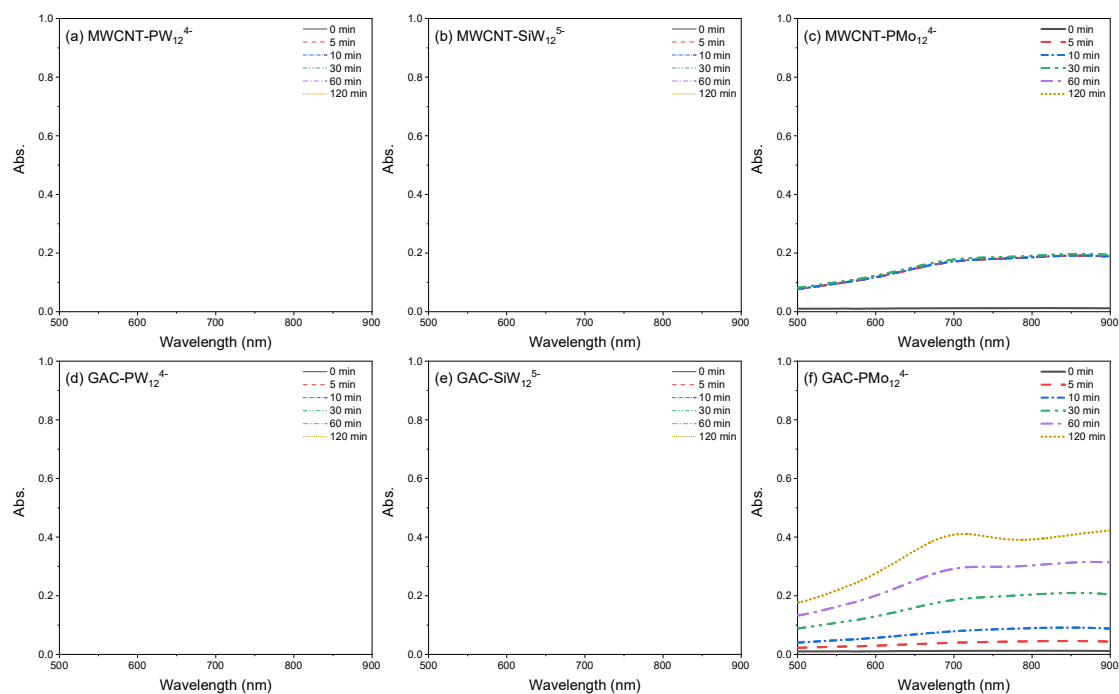

**Figure S2.** Time profile of  $\text{PW}_{12}\text{O}_{40}^{4-}$ ,  $\text{SiW}_{12}\text{O}_{40}^{5-}$  and  $\text{PMo}_{12}\text{O}_{40}^{4-}$  production in the presence of MWCNT and GAC systems at acidic pH condition ( $[\text{PW}_{12}\text{O}_{40}^{3-}]_0 = [\text{SiW}_{12}\text{O}_{40}^{4-}]_0 = [\text{PMo}_{12}\text{O}_{40}^{3-}]_0 = 1.0 \text{ mM}$ ,  $[\text{MWCNT-Comocat}]_0 = 2.0 \text{ g/L}$ ,  $[\text{pH}]_0 = 2.5$ , anaerobic condition, [reaction time = 120 min]).

## References

34. Tamura, H.; Goto, K.; Yotsuyanagi, T.; Nagayama, M. Spectrophotometric Determination of Iron(II) with 1,10-phenanthroline in the Presence of Large Amounts of Iron(III). *Talanta* **1974**, 21, 314–318.
35. Clesceri, L.S.; Greenberg, A.E.; Eaton, A.D. *Standard Methods for the Determination of Water and Wastewater*, 20th ed.; United Book Press, Inc.: Baltimore, MD, USA, 1998.
